# Supplementary material for: The routine use of LCD-Array hybridisation technique for HPV subtyping in the diagnosis of penile carcinoma compared to other methods
Source: Springer Nature journal article supplement (doi:10.1186/s12894-022-00962-4), 2022-01-29
Supplement: MOESM1 [file 12894_2022_962_MOESM1_ESM.pdf]

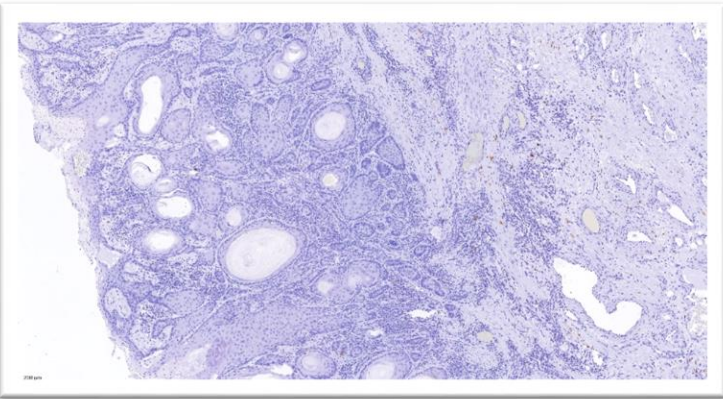

(1)

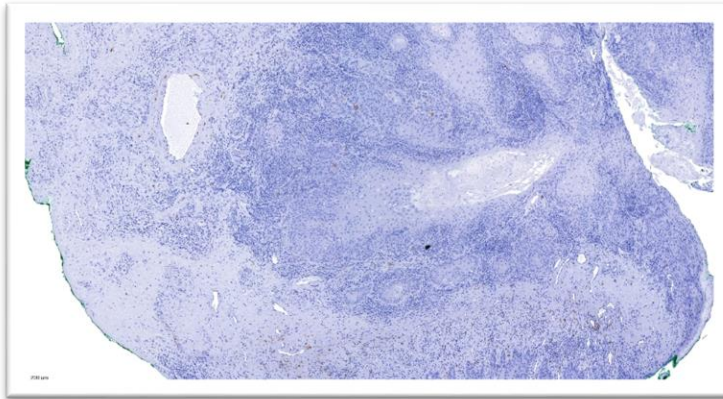

(2)

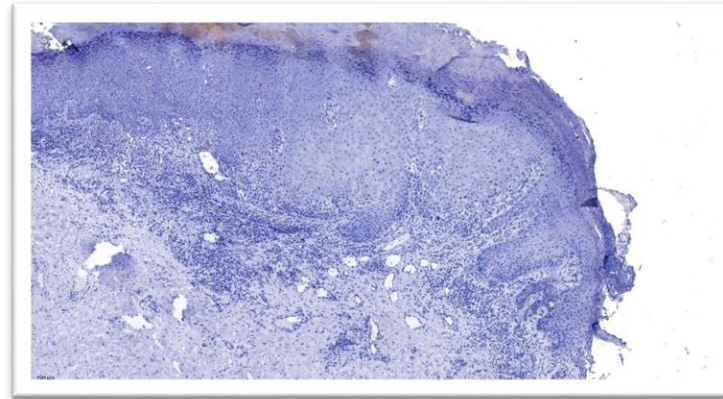

(3)

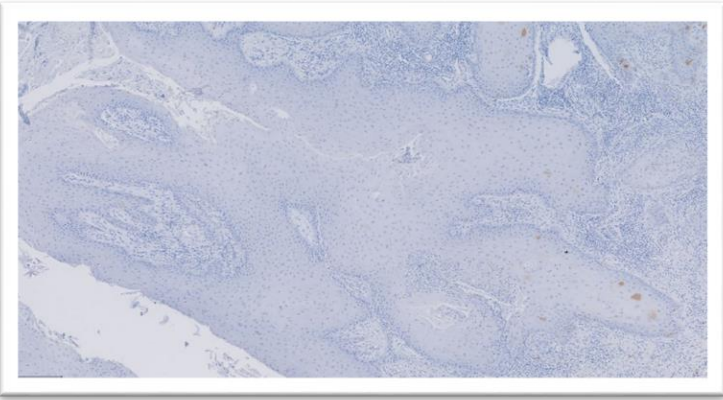

(4)

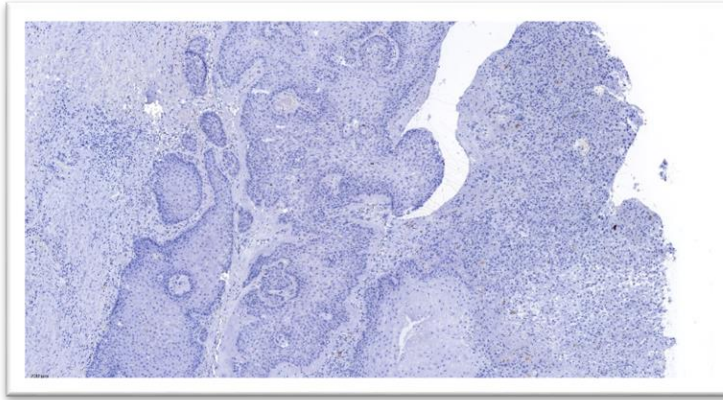

(5)

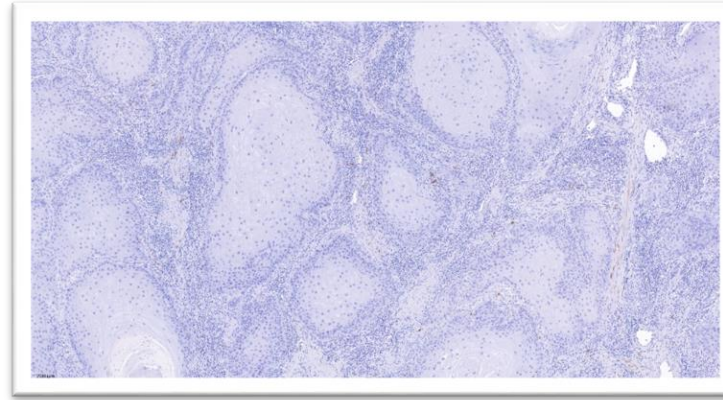

(6)

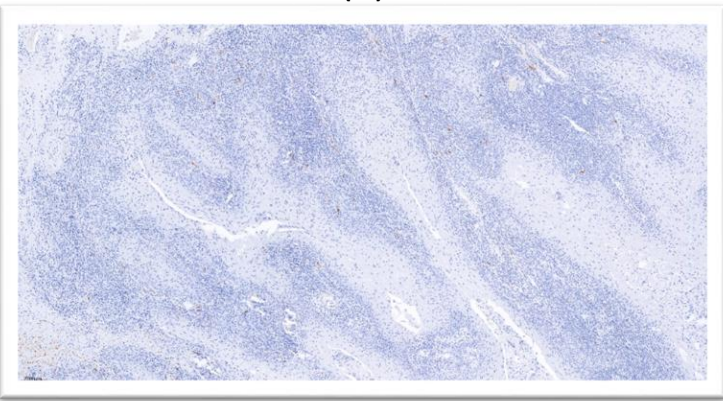

(9)

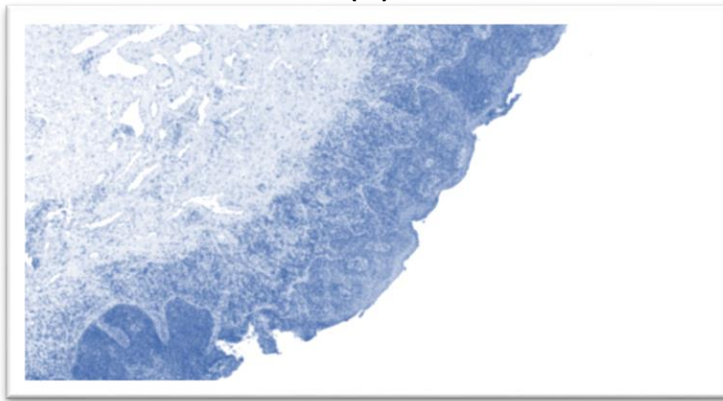

(11)

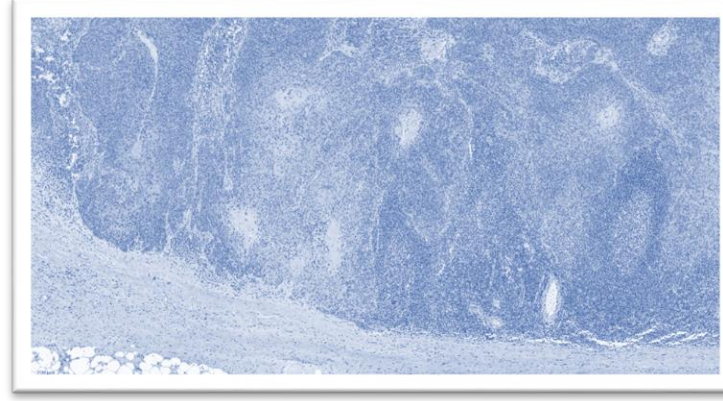

(12)



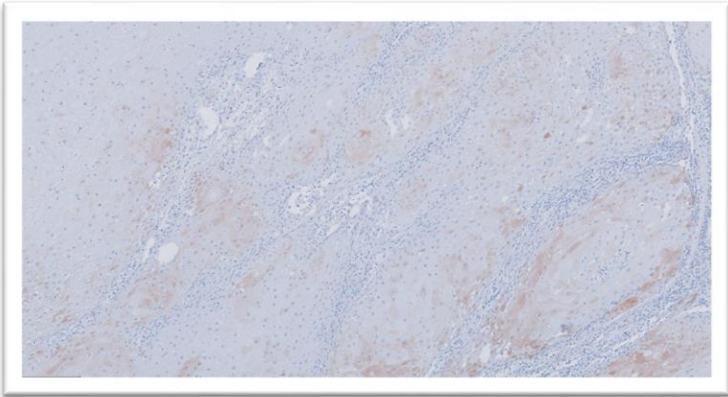

(14)

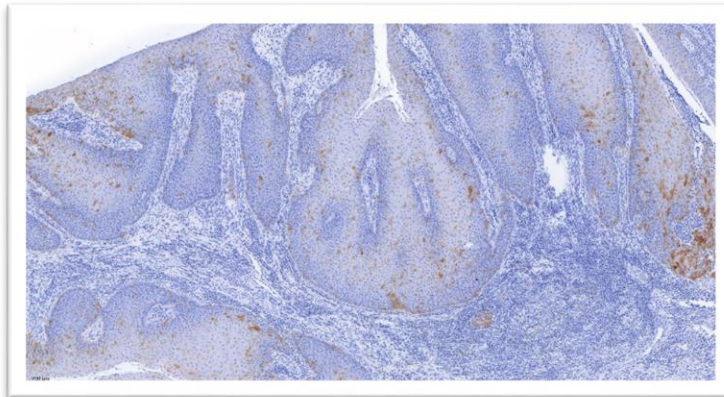

(17)

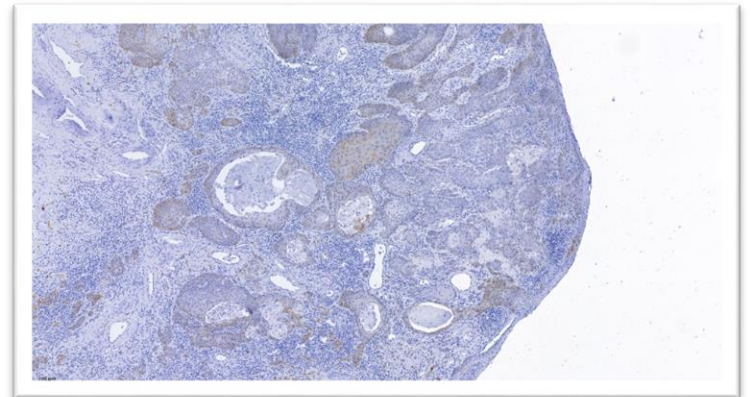

(21)

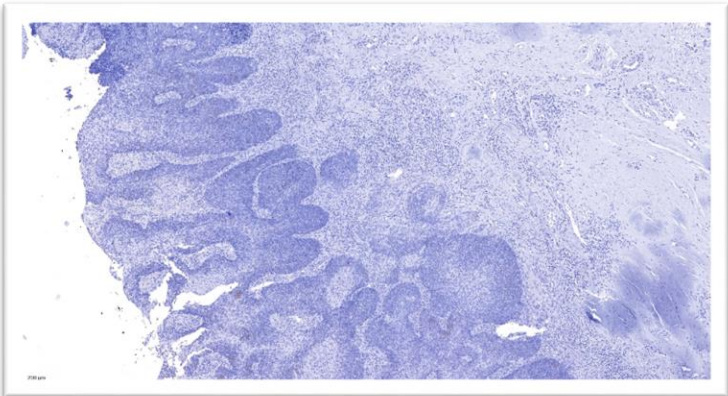

(26)

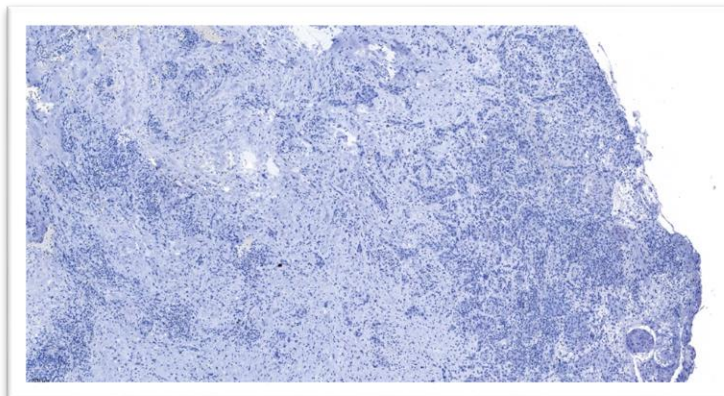

(28)

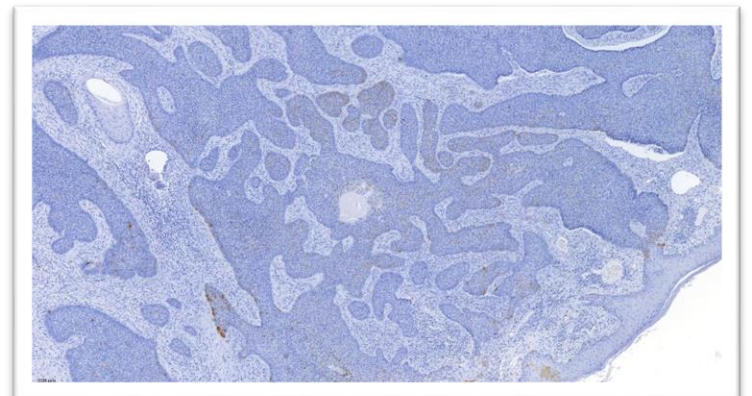

(33)

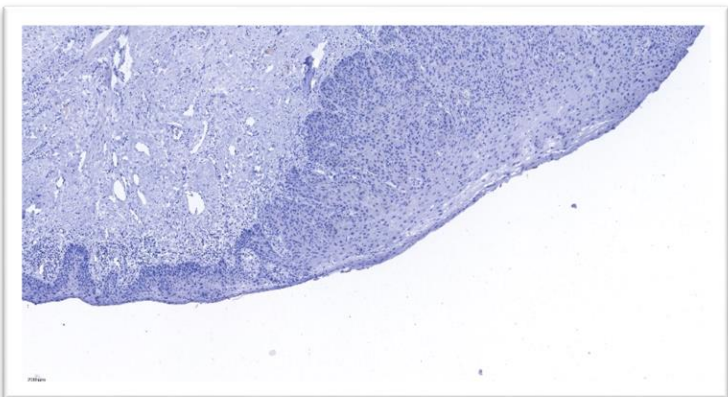

(34)

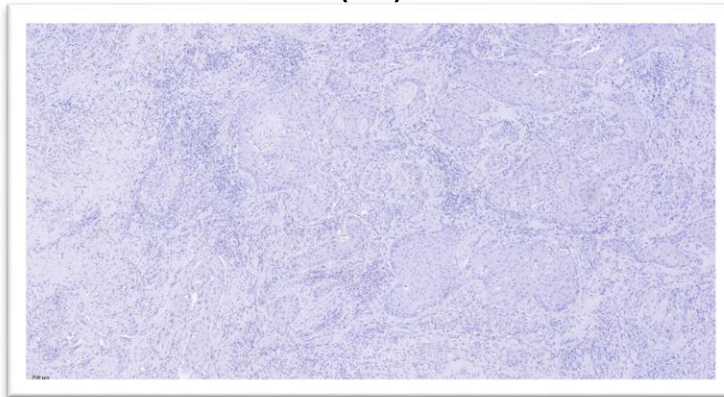

(35)

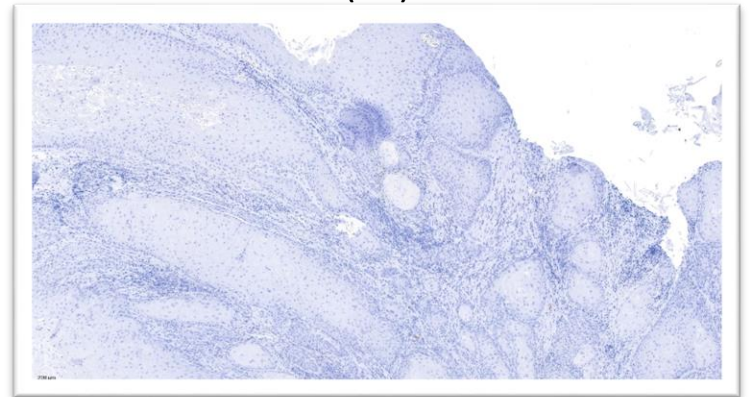

(36)



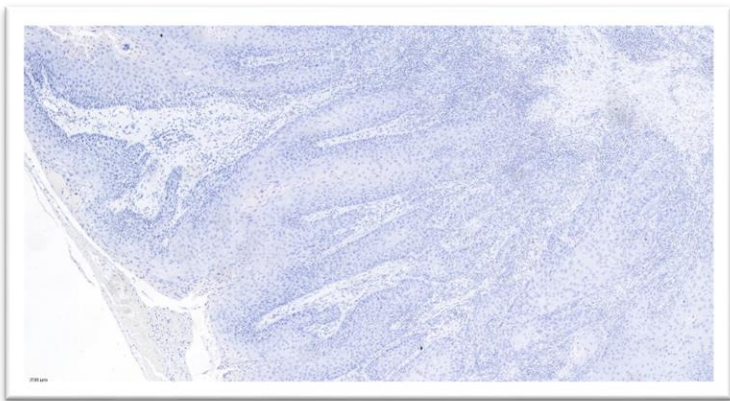

(38)

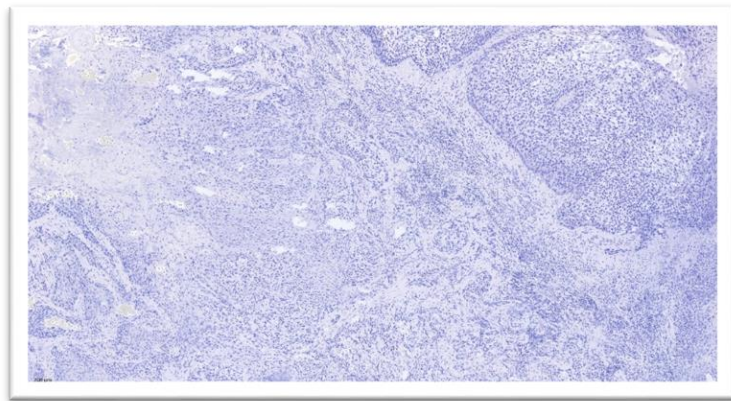

(43)

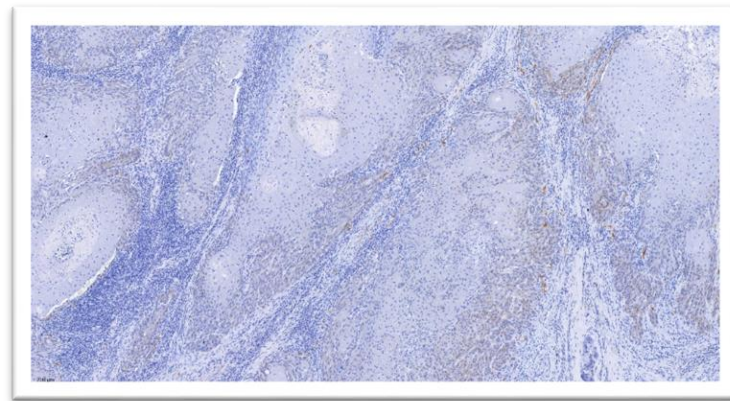

(44)

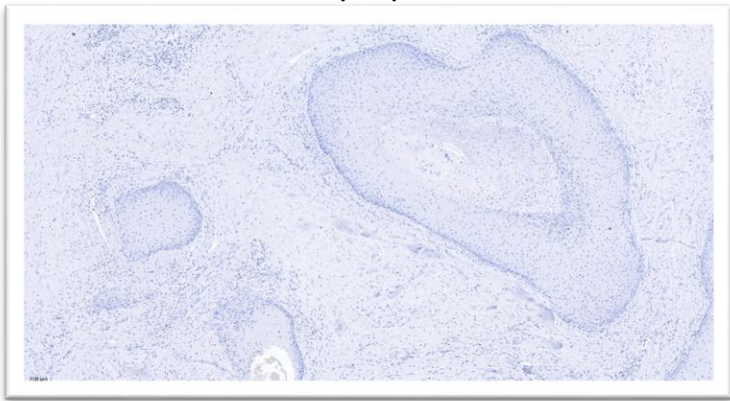

(45)

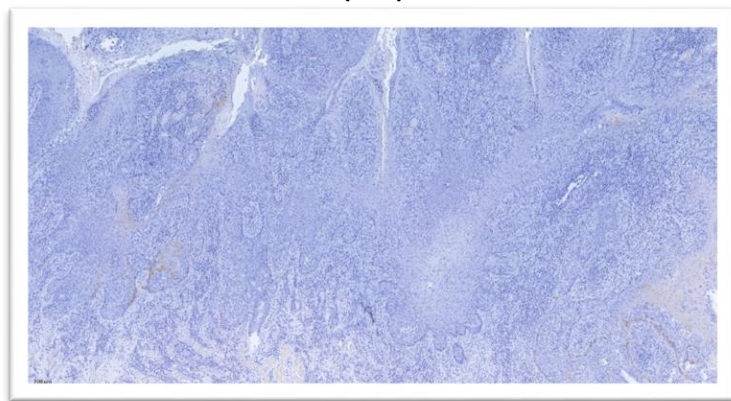

(47)

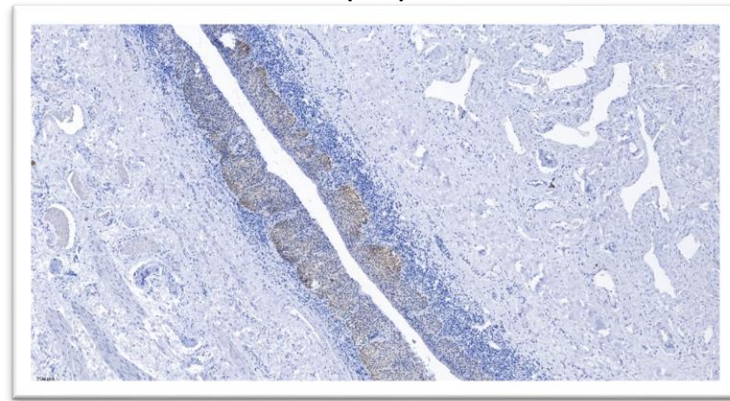

(48)

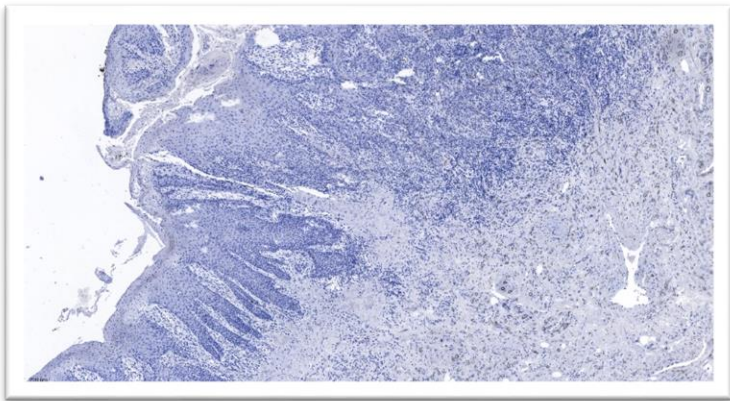

(50)

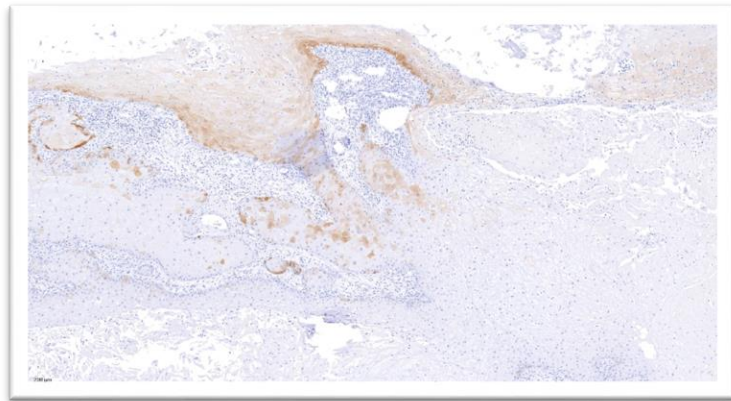

(51)

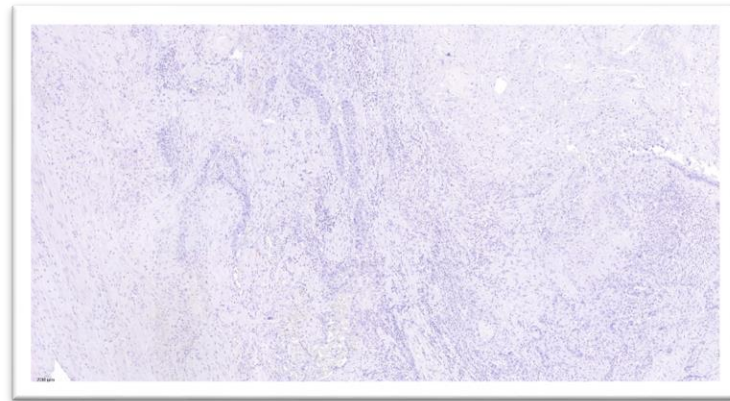

(53)



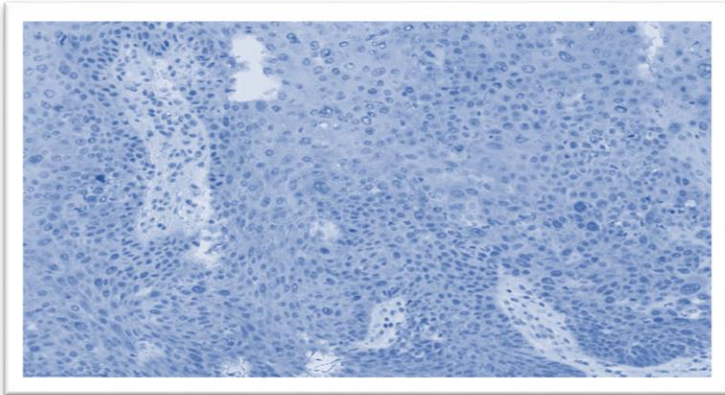

(58)

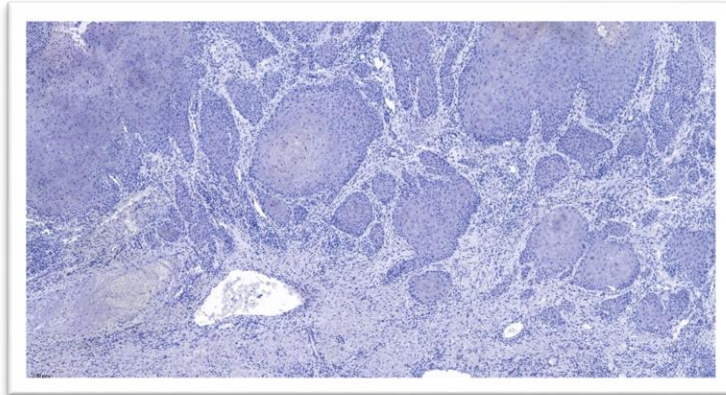

(59)

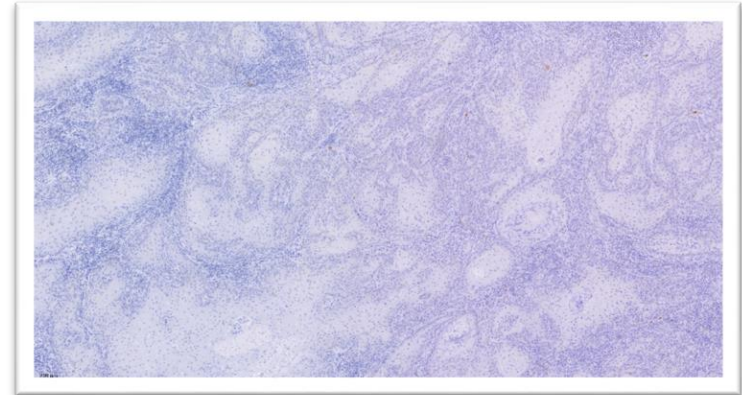

(61)

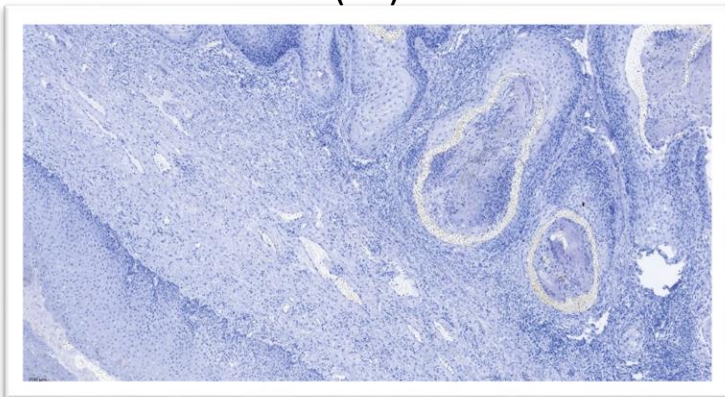

(62)

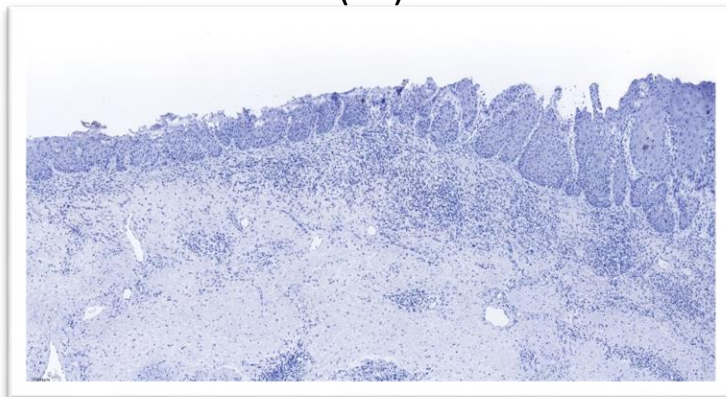

(64)

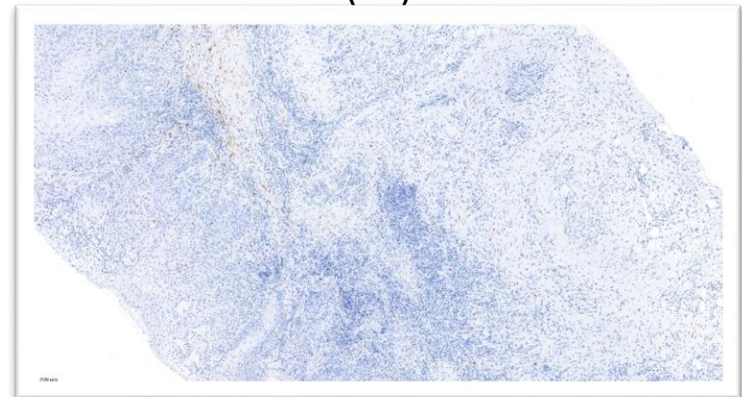

(67)

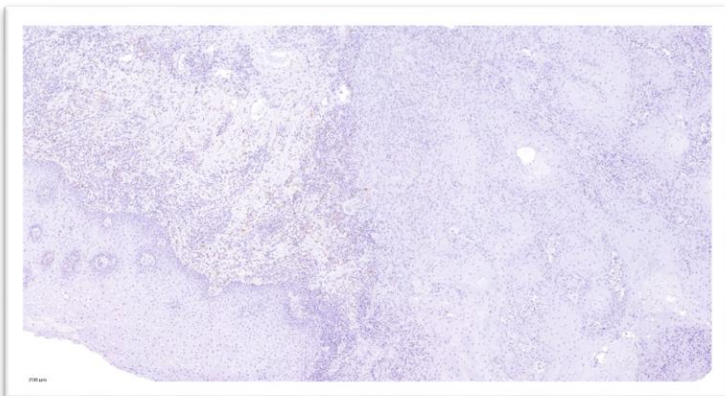

(69)
