# Supplementary material for: The routine use of LCD-Array hybridisation technique for HPV subtyping in the diagnosis of penile carcinoma compared to other methods
Source: Springer Nature journal article supplement (doi:10.1186/s12894-022-00962-4), 2022-01-29
Supplement: MOESM2 [file 12894_2022_962_MOESM2_ESM.pdf]

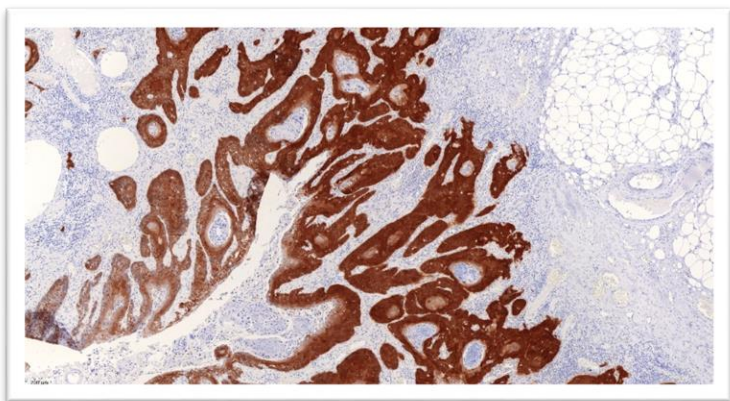

(7)

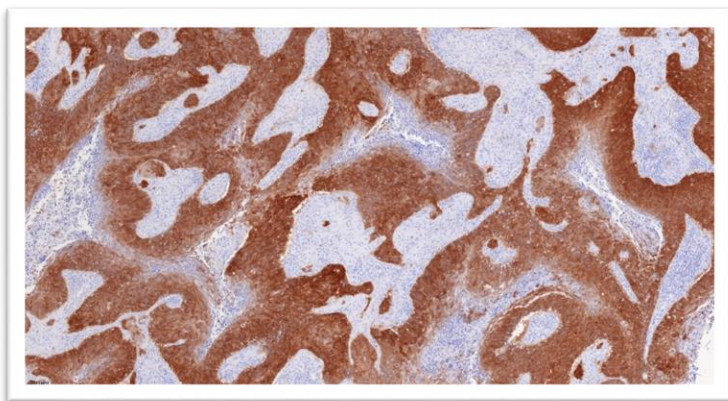

(8)

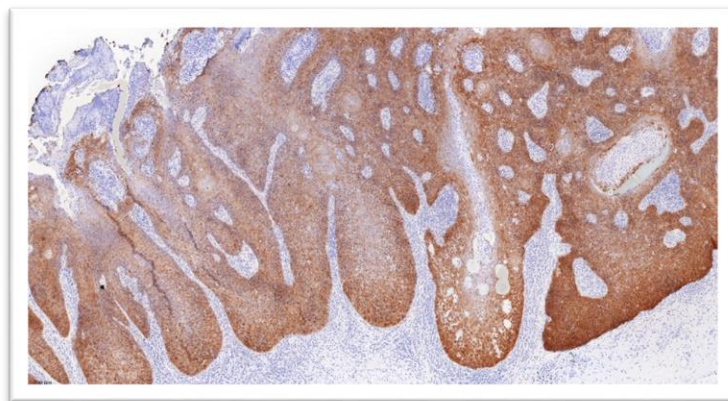

(10)

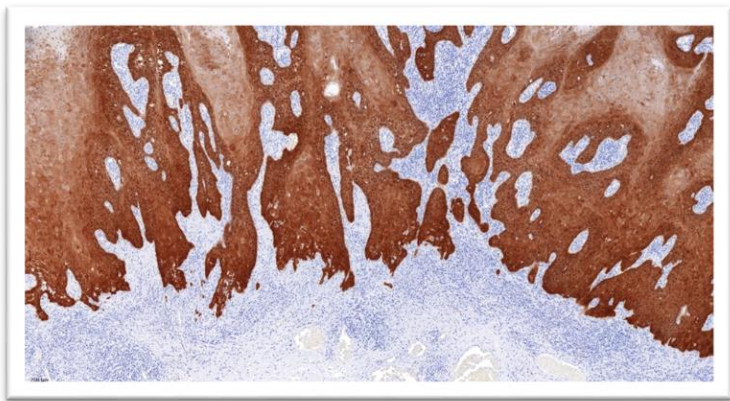

(13)

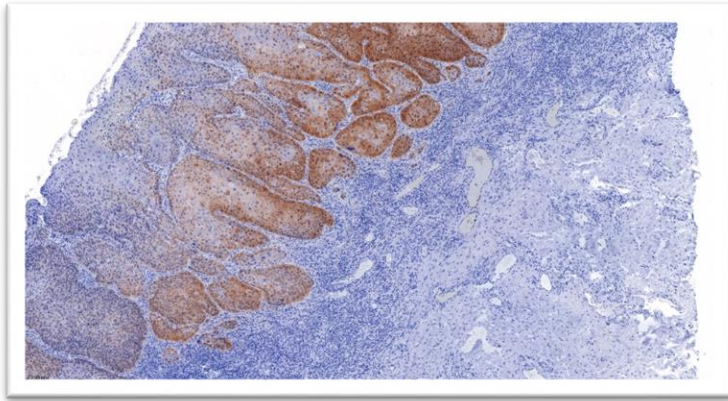

(15)

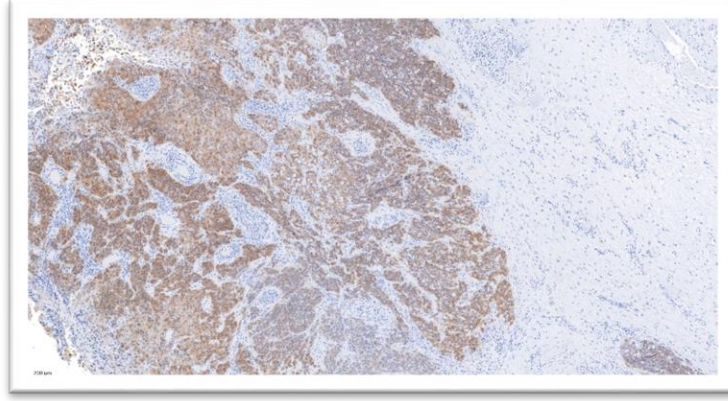

(16)

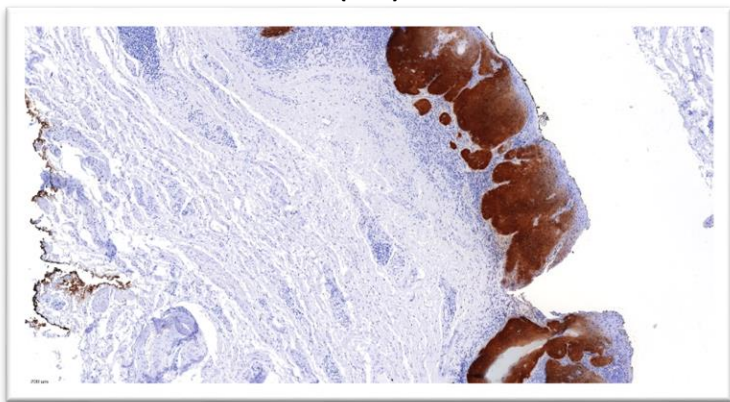

(18)

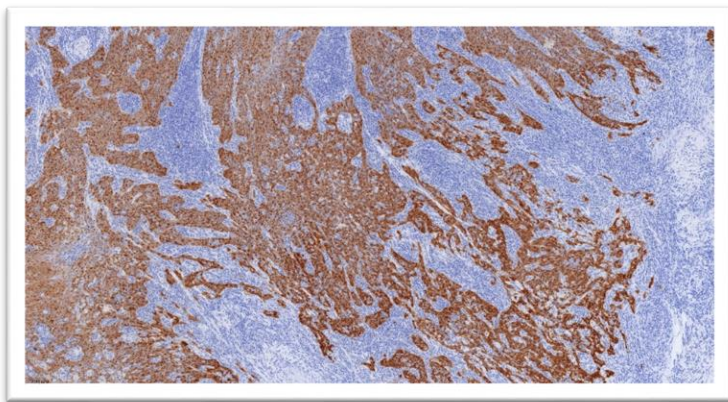

(19)

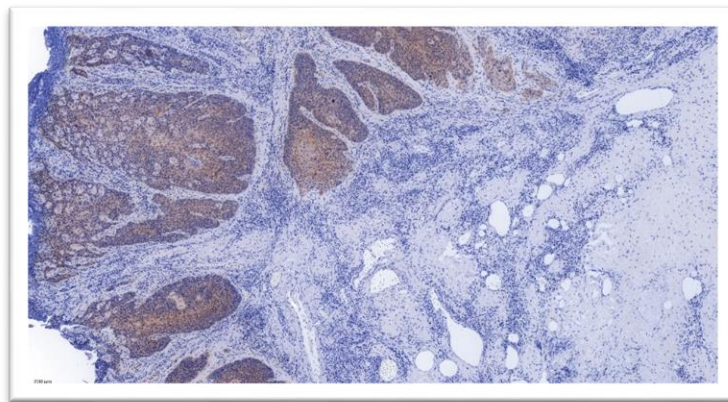

(20)

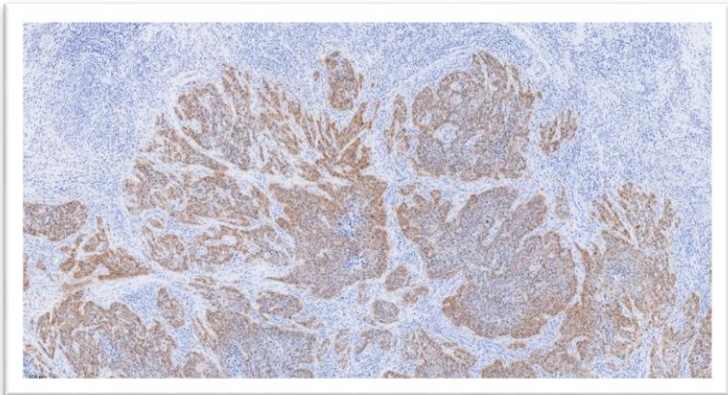

(22)

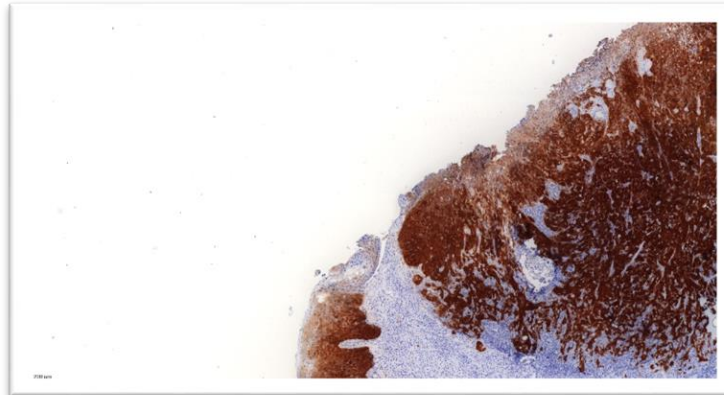

(23)

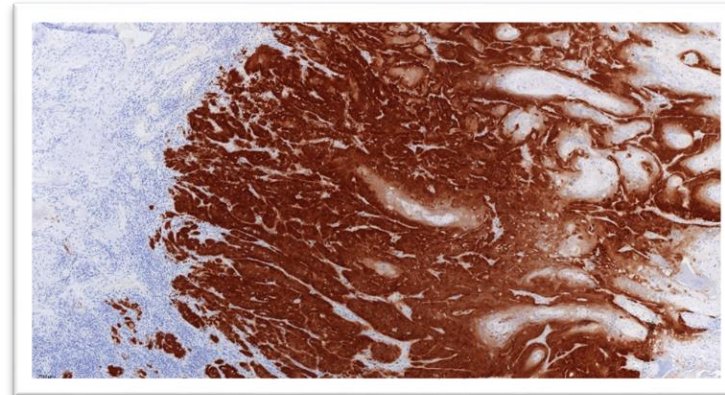

(24)

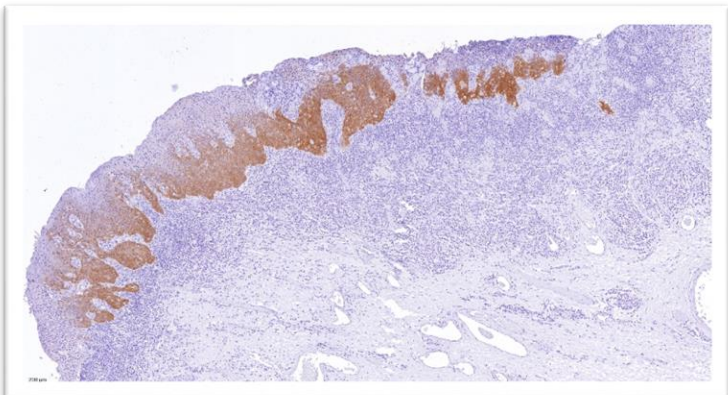

(25)

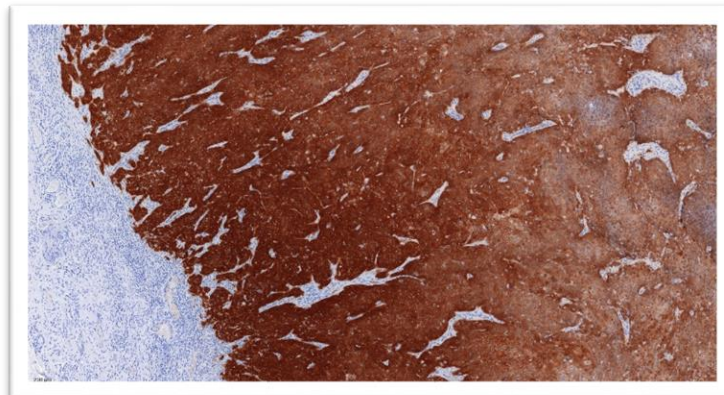

(27)

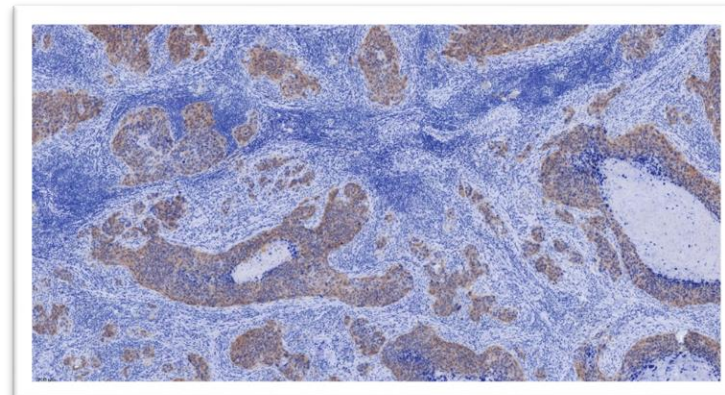

(29)

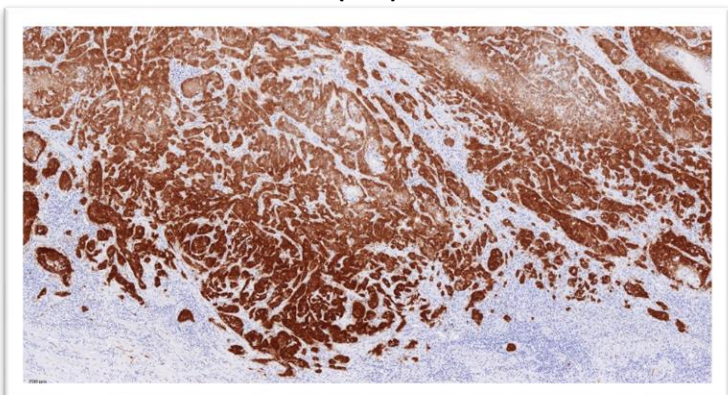

(30)

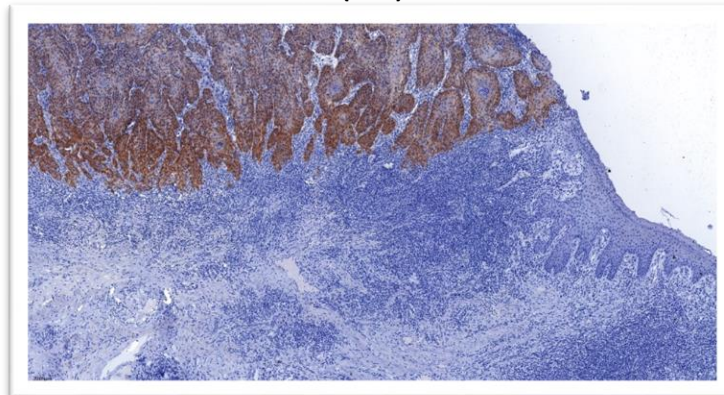

(31)

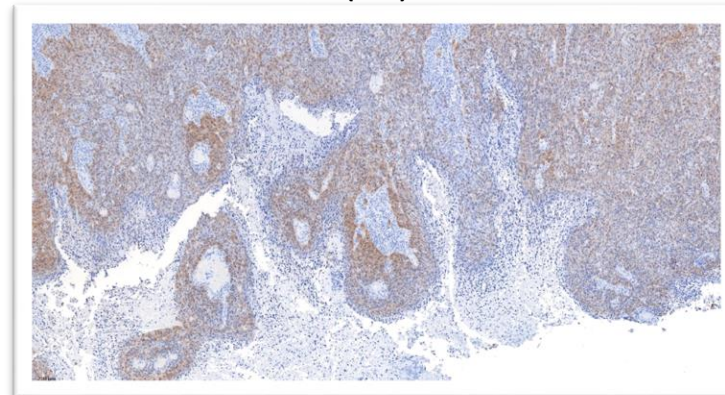

(32)

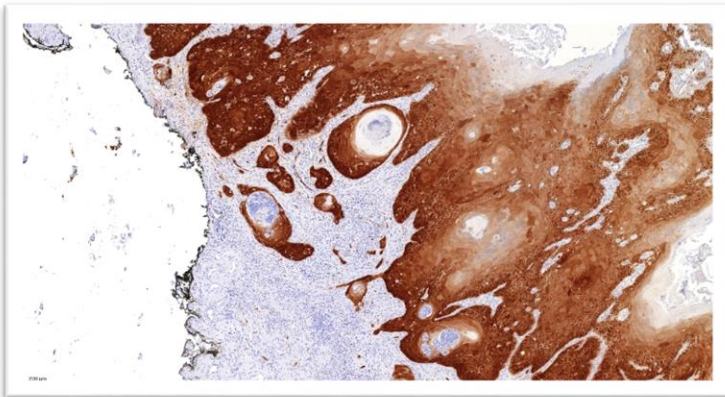

(37)

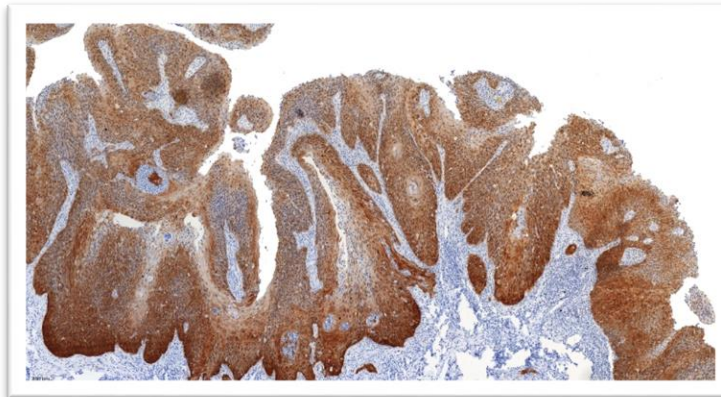

(39)

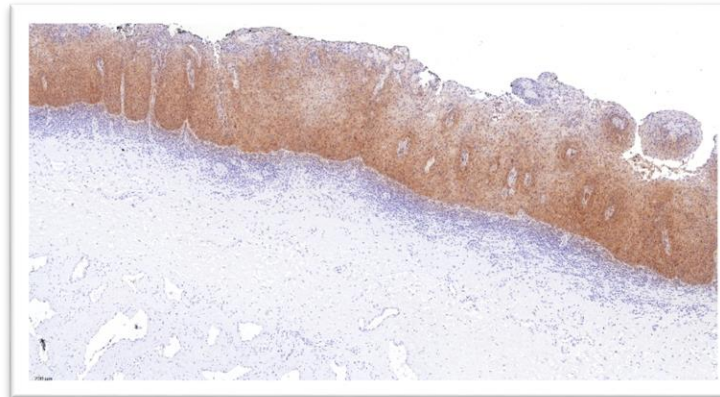

(40)

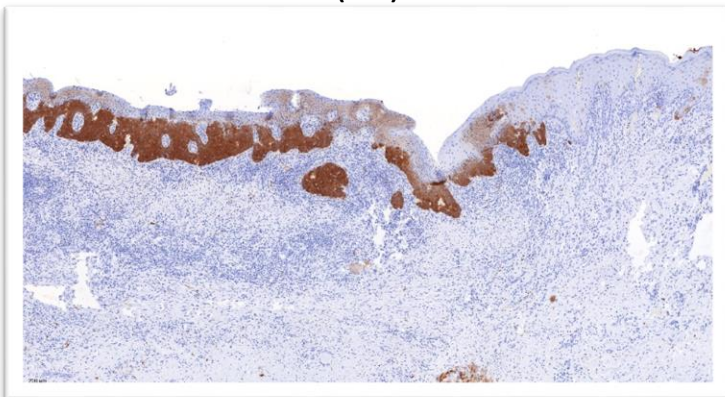

(41)

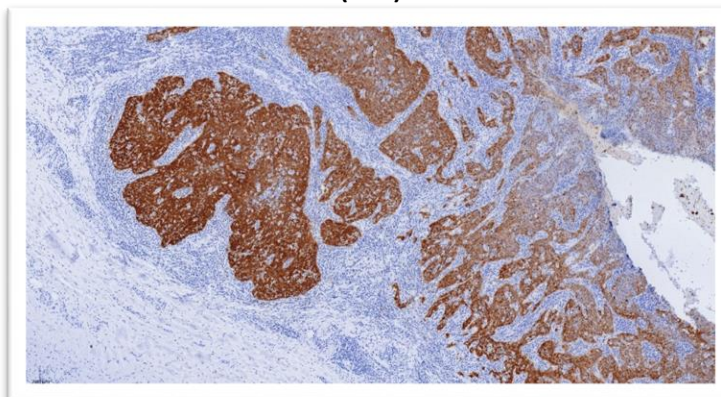

(42)

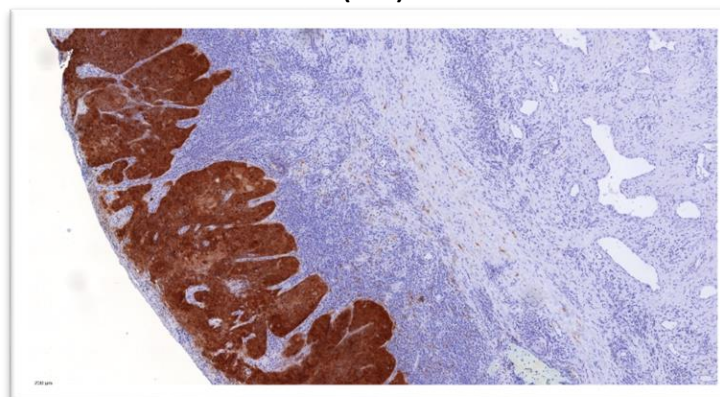

(46)

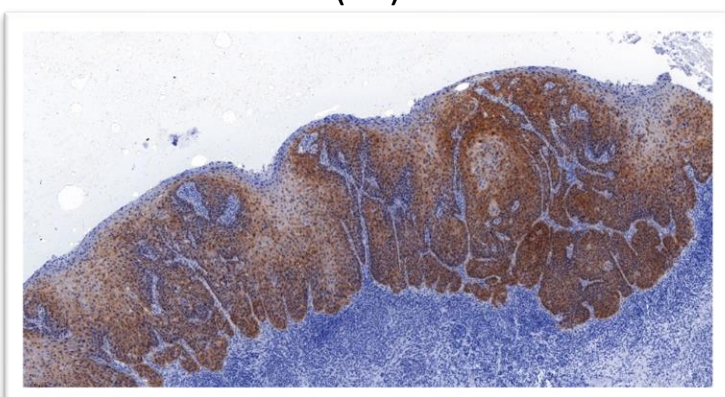

(49)

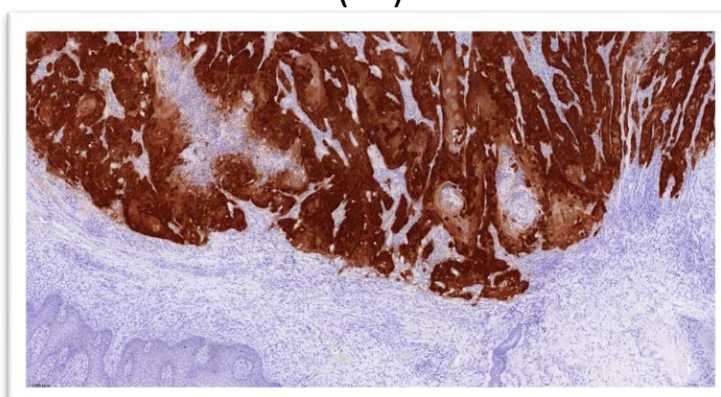

(52)

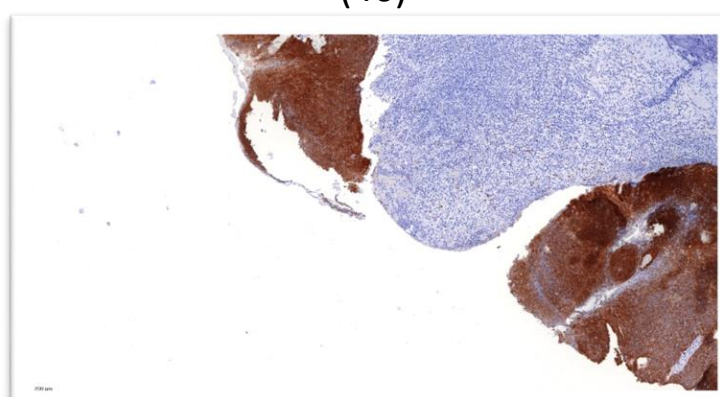

(54)

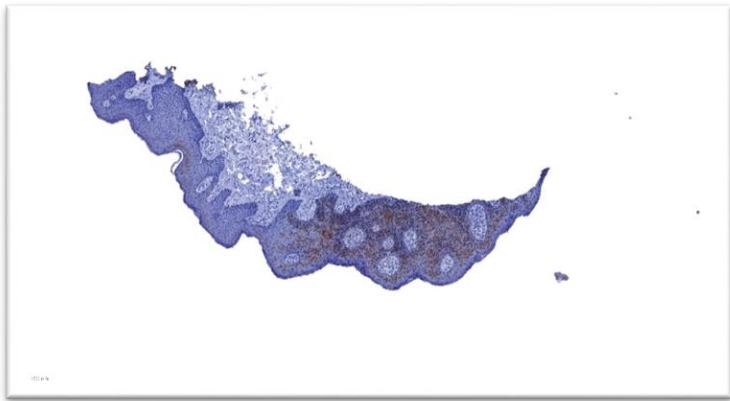

(55)

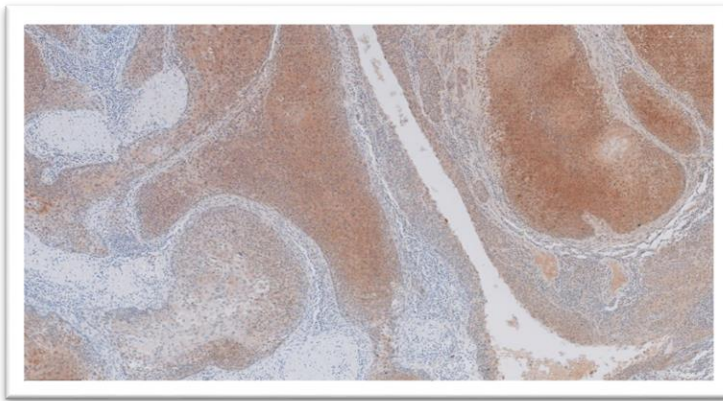

(56)

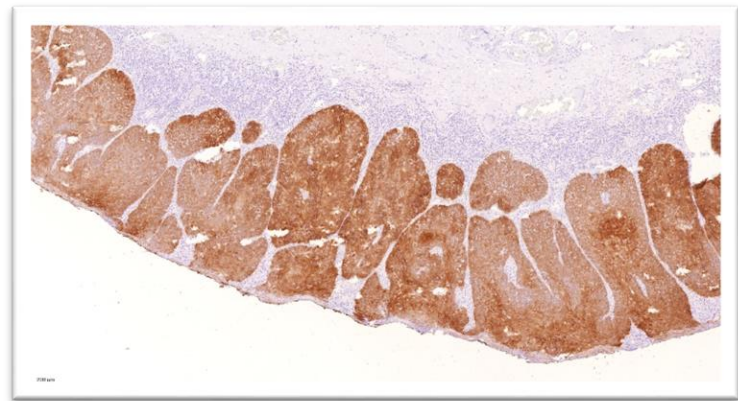

(57)

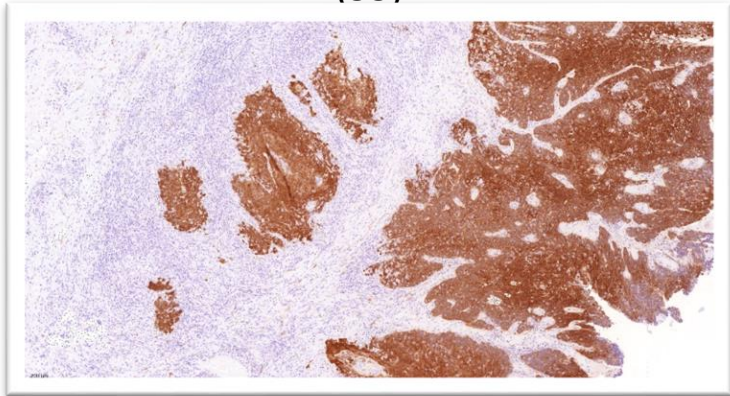

(60)

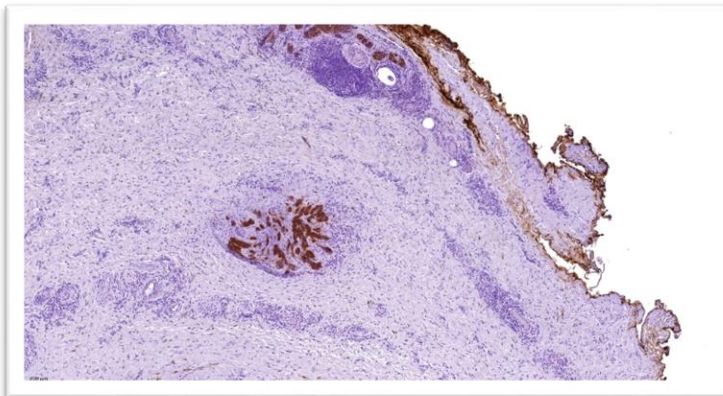

(63)

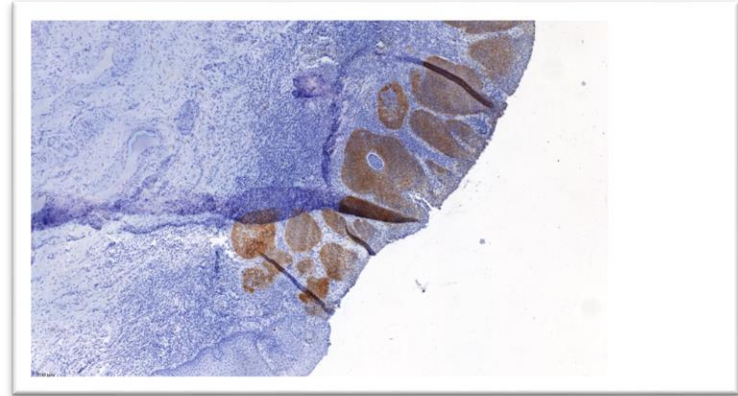

(65)

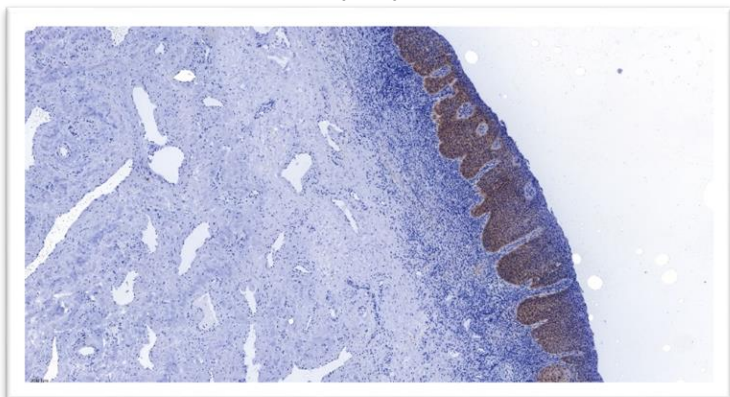

(66)

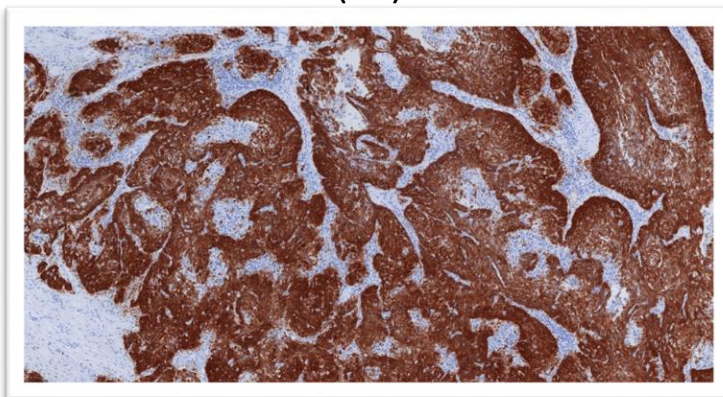

(68)

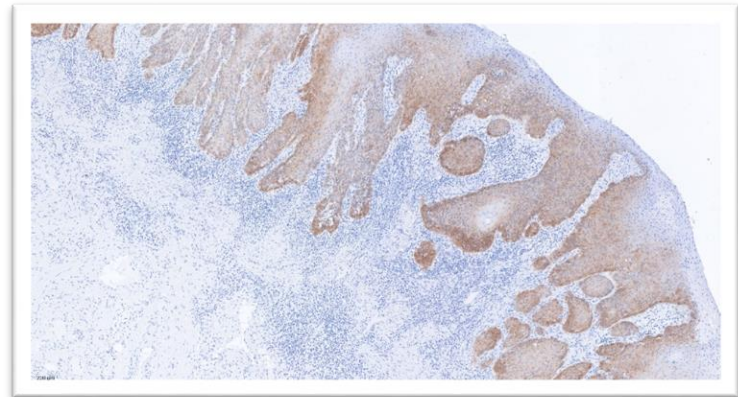

(70)
